# Supplementary material for: Novel twisted-structure polymer electrode material with intrinsic pores for high-performance electrochromic supercapacitor
Source: Royal Society of Chemistry journal article supplement (doi:10.1039/d4qm00992d), 2025-01-01
Supplement: d4qm00992d1.pdf [file d4qm00992d1.pdf]

## Supplementary Information

### **Novel Twisted-Structure Polymer Electrode Material with Intrinsic Pores for High-Performance Electrochromic Supercapacitor**

Yuchen Chang<sup>1,‡</sup>, Qidi Huang<sup>2,‡</sup>, Lei Yang<sup>1</sup>, Mi Ouyang<sup>1</sup>, Yujie Dong<sup>1,\*</sup>, Weijun Li<sup>1</sup>,  
Cheng Zhang<sup>1,\*</sup>

<sup>1</sup> *International Sci. & Tech. Cooperation Base of Energy Materials and Application, College of Chemical Engineering, Zhejiang University of Technology, Hangzhou 310014, P. R. China.*

*E-mail: dongyujie@zjut.edu.cn; czhang@zjut.edu.cn*

<sup>2</sup> *Key Laboratory of Pollution Exposure and Health Intervention of Zhejiang Province, College of Biology and Environmental Engineering, Zhejiang Shuren University, Hangzhou 310015, P. R. China.*

<sup>‡</sup> *Yuchen Chang and Qidi Huang contributed equally to this work*

### Calculation Formulas.

#### 1. Optical contrast

$$\Delta T = |T_{ox} - T_{neut}| \quad (S1)$$

$T_{ox}$  and  $T_{neut}$  represent the transmittance of the material in the oxidation state and in the neutral state, respectively.

#### 2. Coloration efficiency (CE)

$$CE(\lambda) = \Delta A / Q_d = \log[T_{ox} / T_{neut}] / Q_d \quad (S2)$$

where  $\Delta A$  denotes the change in absorbance per unit area, which is expressed by the logarithm of the ratio of the oxidized state transmittance ( $T_{ox}$ ) and the neutral state transmittance ( $T_{neut}$ ), and  $Q_d$  denotes the charge injected per unit area of the electrode, which can be obtained by integrating the timing current curve.

#### 3. Area-specific capacitance

$$C_s = I \times t / \Delta V \times s \quad (S3)$$

where  $I/s$  is the current density in  $\text{mA}/\text{cm}^2$ ,  $t$  is the discharge time of the material in  $s$ , and  $\Delta V$  is the voltage window in  $V$ .

#### 4. Volume ratio capacitance

$$C_v = I \times t / \Delta V \times v \quad (S4)$$

where  $v$  ( $\text{cm}^3$ ) represents the volume of the electrode material.

#### 5. Coulombic efficiency (CE')

$$CE' = C_d / C_c \times 100\% \quad (S5)$$

$C_d$  and  $C_c$  refer to the discharge capacitance and charge capacitance respectively.

#### 6. Energy density

$$E = CU^2 / 2 \quad (S6)$$

$C$  and  $U$  refer to the specific capacitance and potential window of the supercapacitor, respectively.

## 7. Power density

$$P = E/t \tag{S7}$$

E and t refer to energy density and discharging time of the supercapacitor, respectively.

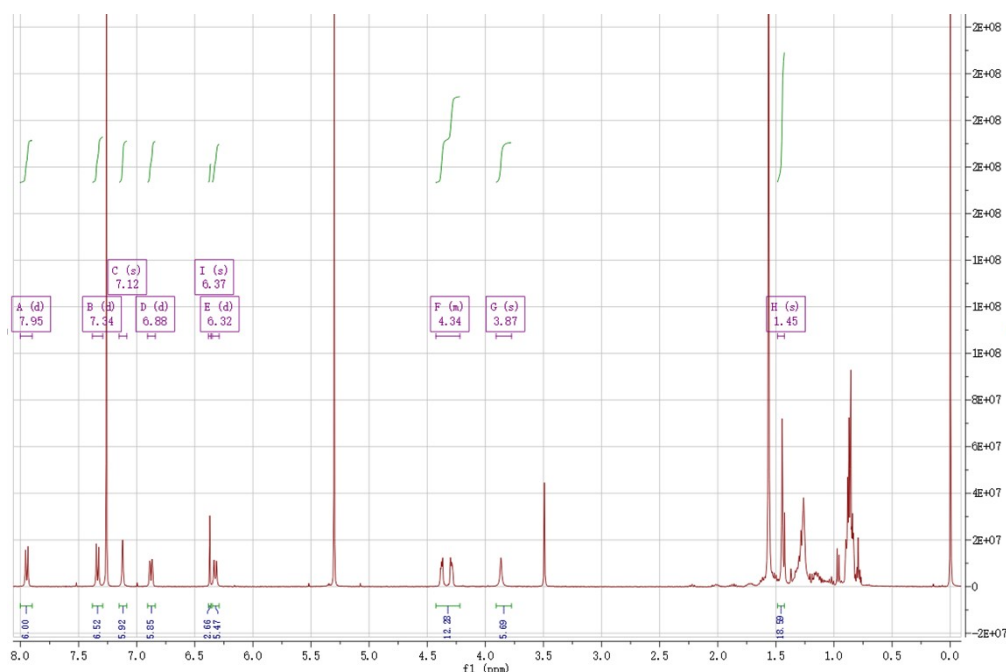

**Fig. S1**  $^1\text{H}$  NMR spectrum of 3DMAC-EDOT in  $\text{CDCl}_3$ .

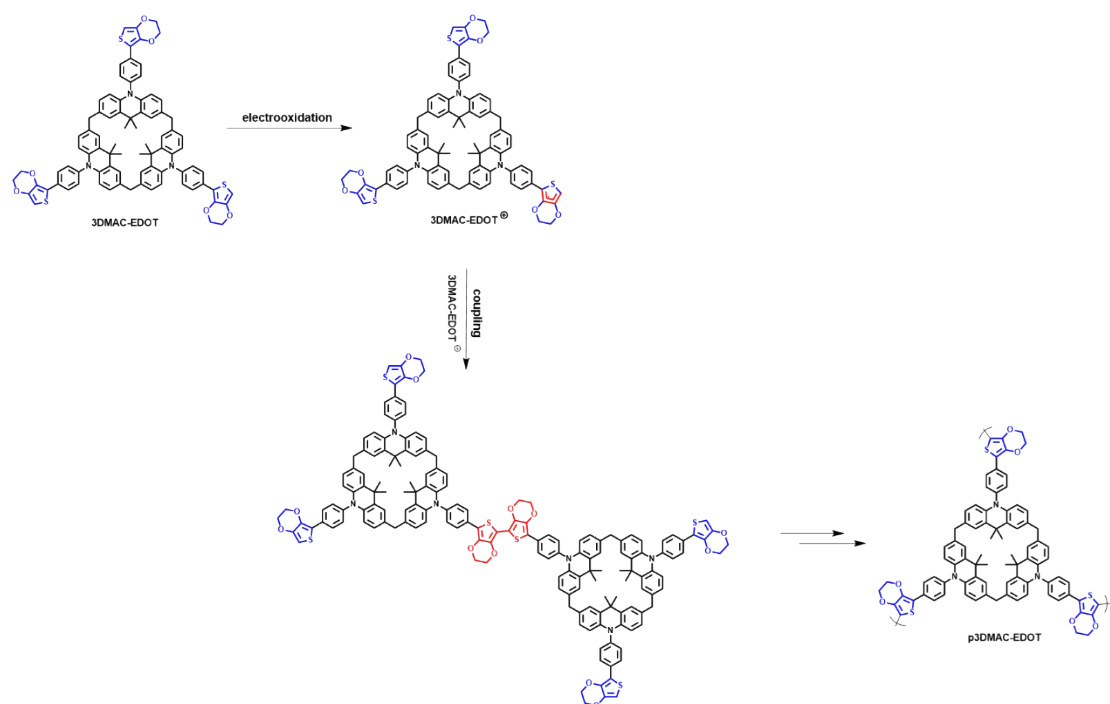

**Fig. S2** p3DMAC-EDOT specific polymerization mechanisms

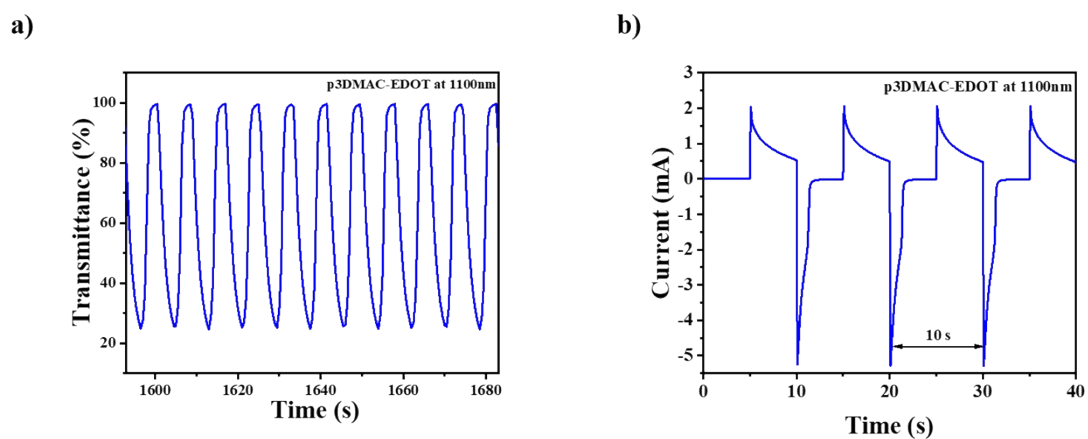

**Fig. S3** Transmittance a) and current b) dynamics of p3DMAC-EDOT at 5 s pulse time.

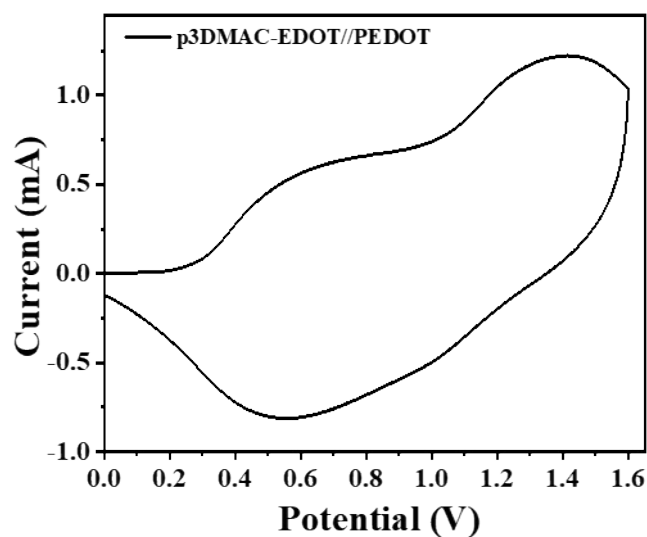

**Fig. S4** CV curves for p3DMAC-EDOT//PEDOT devices with a sweep rate of 100 mV/s.

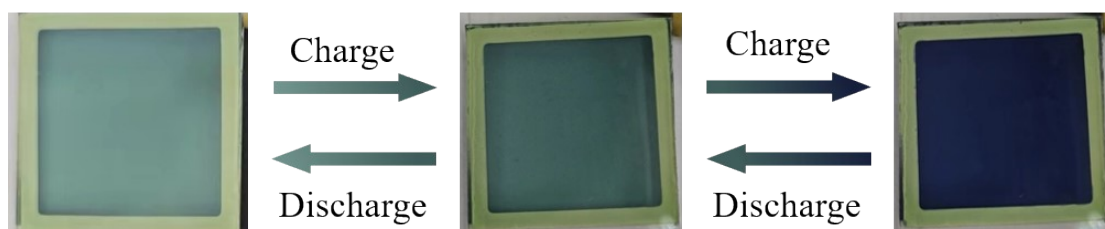

**Fig. S5** Exterior color photos of p3DMAC-EDOT//PEDOT devices at different voltages.

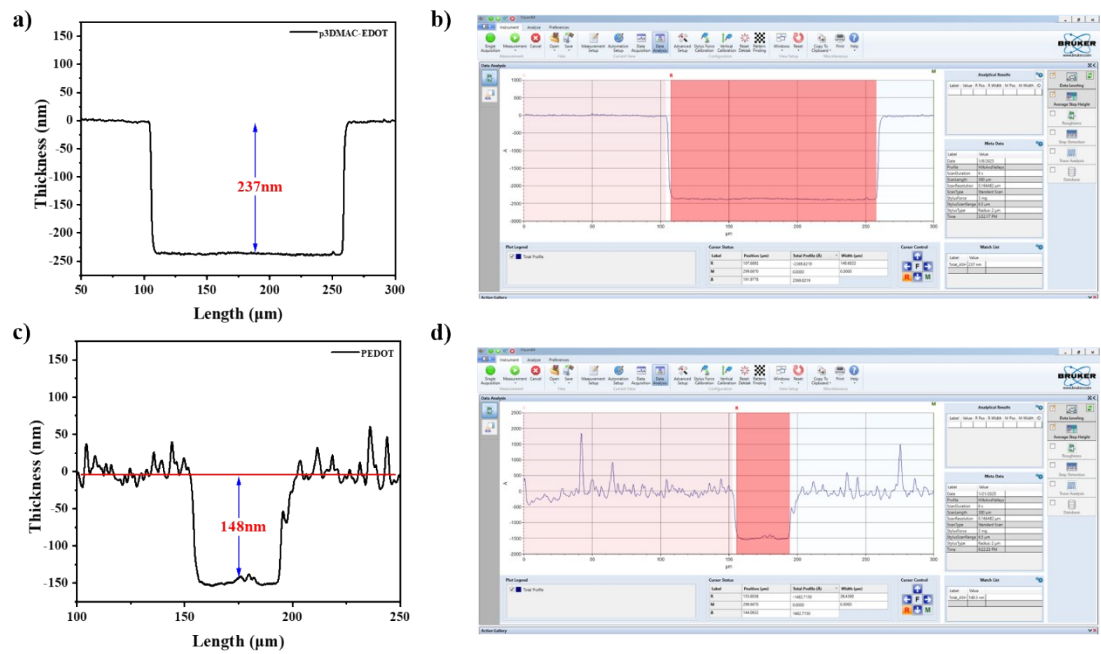

**Fig. S6** Thickness of a) and b). p3DMAC-EDOT film, c) and d). PEDOT film.
